1  
2  
3  
4  
5  
6  
7  
8  
9  
10  
11  
12  
13  
14  
15  
16  
17  
18  
19  
20  
21  
22  
23  
24  
25  
26  
27  
28  
29  
30  
31  
32  
33  
34  
35  
36  
37  
38  
39  
40  
41  
42  
43  
44  
45  
46  
47

## **No general relationship between mass and temperature in endothermic species**

Kristina Riemer<sup>1\*</sup>, Robert P Guralnick<sup>2</sup>, Ethan White<sup>1,3</sup>

Bergmann's rule is a widely-accepted biogeographic rule stating that individuals within a species are smaller in warmer environments. While there are many single-species studies and integrative reviews documenting this pattern, a data-intensive approach has not been used yet to determine the generality of this pattern. We assessed the strength and direction of the intraspecific relationship between temperature and individual mass for 952 bird and mammal species. For eighty-seven percent of species, temperature explained less than 10% of variation in mass, and for 79% of species the correlation was not statistically significant. These results suggest that Bergmann's rule is not general and temperature is not a dominant driver of biogeographic variation in mass. Further understanding of size variation will require integrating multiple processes that influence size. The lack of dominant temperature forcing weakens the justification for the hypothesis that global warming could result in widespread decreases in body size.

<sup>1</sup>Department of Wildlife Ecology and Conservation, 110 Newins-Ziegler Hall, PO Box 110430, University of Florida, Gainesville, FL 32611-0430, USA

<sup>2</sup>Department of Natural History, University of Florida, Gainesville, FL 32611

<sup>3</sup>Informatics Institute, 432 Newell Drive, PO Box 115585, University of Florida, Gainesville, FL 32611-8545

Correspondence and requests for materials should be addressed to K.R. (email: [kristina.riemer@weecology.org](mailto:kristina.riemer@weecology.org))

## 48 INTRODUCTION

49 Bergmann's rule describes a negative relationship between body mass and temperature  
50 across space that is believed to be common in endothermic species (Bergmann, 1847; Brown and  
51 Lee, 1969; Kendeigh, 1969; Freckleton et al., 2003; Carotenuto et al., 2015). Many hypotheses  
52 have been proposed to explain this pattern (Blackburn et al., 1999; Ashton, 2002; Watt et al.,  
53 2010) including the heat loss hypothesis, which argues that the higher surface area to volume  
54 ratio of smaller individuals results in improved heat dissipation in hot environments (Bergmann,  
55 1847). Though originally described for closely-related species (i.e., interspecific; Blackburn et  
56 al., 1999), the majority of studies have focused on the intraspecific form of Bergmann's rule  
57 (Rensch, 1938; Meiri, 2011) by assessing trends in individual size within a species (Langvatn  
58 and Albon, 1986; Gardner et al., 2009; Yom-Tov and Geffen, 2006). Bergmann's rule has been  
59 questioned both empirically and mechanistically (McNab, 1971; Geist, 1987; Huston and  
60 Wolverton, 2011; Teplitsky & Millien, 2014) but the common consensus from recent reviews is  
61 that the pattern is general (Ashton, 2002; Watt et al., 2011; Ashton et al., 2000; Meiri and Dayan,  
62 2003).

63 It has recently been suggested that this negative relationship between mass and  
64 temperature could result in decreasing individual size across species in response to climate  
65 change (Sheridan and Bickford, 2011) and that this may be a “third universal response to  
66 warming” (Gardner et al., 2011). The resulting shifts in size distributions could significantly alter  
67 ecological communities (Brose et al., 2012), especially if the rate of size decrease varies among  
68 species (Sheridan and Bickford, 2011). While there is limited empirical research on body size  
69 responses to changes in temperature through time (but see Teplitsky and Millien, 2014; Smith et  
70 al., 1995; Caruso et al., 2014), the apparent generality of Bergmann's rule across space indicates  
71 the likelihood of a similar relationship in response to temperature change across time.

72           The generality of Bergmann's rule is based on many individual studies that analyze  
73 empirical data on body size across an environmental gradient (e.g., Langvatn and Albon, 1986;  
74 Barnett, 1977; Fuentes and Jaksic, 1979; Dayan et al., 1989; Sand et al., 1995) and reviews that  
75 compile and evaluate the results from these studies (Ashton, 2002; Watt et al., 2010; Meiri and  
76 Dayan 2003). Most individual studies of Bergmann's rule are limited by: 1) analyzing only one  
77 or a few species (e.g., Langvatn and Albon, 1986); 2) using small numbers of observations (e.g.,  
78 Fuentes and Jaksic, 1979); 3) only including data at the small scales typical of ecological studies  
79 (e.g., Sand et al., 1995); 4) using latitude instead of directly assessing temperature (e.g., Barnett,  
80 1977); and 5) focusing on statistical significance instead of the strength of the relationship (e.g.,  
81 Dayan et al., 1989). The reviews tabulate the results of these individual studies and assess  
82 patterns in the direction and significance of relationships across species. Such aggregation of  
83 published results allows for a more general understanding of the pattern but, in addition to  
84 limitations of the underlying studies, the conclusions may be influenced by publication bias and  
85 selective reporting where studies or individual analyses that do not support Bergmann's rule are  
86 published less frequently (Koricheva et al., 2013).

87           Previous analyses of publication bias in the context of Bergmann's rule have found no  
88 evidence for selective publication, which supports the idea that it is a general rule (Ashton, 2002;  
89 Meiri et al., 2004). However, two of the most extensive studies of Bergmann's rule, which both  
90 used museum records to assess dozens of intraspecific Bergmann's rule relationships  
91 simultaneously, found that the majority of species did not exhibit significant negative  
92 relationships between latitude and size (McNab, 1971; Meiri et al., 2004). As a result,  
93 understanding the generality of this ecophysiological rule and its potential implications for global  
94 change requires more extensive analysis.

95           A data-intensive approach to analyzing Bergmann's rule, evaluating the pattern using

96 large amounts of broad scale data, has the potential to overcome existing limitations in the  
97 literature and provides a new perspective on the generality of the intraspecific form of  
98 Bergmann's rule. Understanding the generality of the temperature-mass relationship has  
99 important implications for how size will respond to climate change. We use data from Vertnet  
100 (Constable et al., 2010), a large compilation of digitized museum records that contains over  
101 700,000 globally distributed individual-level size measures, to evaluate the intraspecific  
102 relationship between temperature and mass for 952 mammal and bird species. The usable data  
103 consist of 273,901 individuals with an average of 288 individuals per species, with individuals of  
104 each species spanning an average of 75 years and 34 latitudinal degrees. This approach reduces  
105 or removes many of the limitations to previous approaches and the results suggest that  
106 Bergmann's rule is not a strong or general pattern.

107

108

## 109 **RESULTS**

110 Most of the species in this study showed weak non-significant relationships between  
111 temperature and mass (Figures 1 and 2). The distribution of correlation coefficients was centered  
112 near zero with a mean correlation coefficient of -0.05 across species (Figure 2A). Relationships  
113 for 79% of species were not significantly different from zero, while 14% of species' relationships  
114 were significant and negative and 7% were significant and positive (Figure 2A). Temperature  
115 explained less than 10% of variation in mass (i.e.,  $-0.316 < r < 0.316$ ) for 87% of species,  
116 indicating that temperature explained very little of the observed variation in mass for these  
117 species (Figure 2A).

118 The weak, non-directional intraspecific relationships indicated by the distribution of  
119 correlation coefficients are consistent across taxonomic groups and temporal lags. Mean

120 correlation coefficients for both endothermic classes are -0.006 and -0.065, for mammals and  
121 birds respectively (Figure 2B). Similarly, correlation coefficient distributions were  
122 approximately centered on zero for all of the 30 orders analyzed ( $-0.2 < \bar{r} < 0.003$  for orders with  
123 more than 10 species; Figure 3 and Figure 3—figure supplement 1), or for migrant or nonmigrant  
124 bird species (Figure 2-figure supplement 1). Correlation coefficient distributions for temperature-  
125 mass relationships using lagged temperatures were centered around zero like those using  
126 temperature from the collection year (Figure 4 and Figure 4—figure supplement 1), indicating that  
127 there was not a temporal lag effect on the response of species' masses to temperature. Correlation  
128 coefficients did not vary systematically by sample size (Figure 5A), extent of variation in  
129 temperature or mass (Figure 5B,C), species' average mass (Figure 5D), or species' average  
130 latitude (Figure 5E). While temperature is considered the actual driver, some studies use latitude  
131 as a proxy when evaluating variation in size (Bergmann, 1847; Stillwell, 2010) Using latitude,  
132 the mean correlation coefficient was -0.05 with no statistically significant latitude-mass  
133 relationship for 71% of species (Figure 2—figure supplement 2), while the respective values for  
134 temperature were -0.05 and 79% (Figure 2A). Results were robust to a variety of decisions and  
135 stringencies about how to filter the size (Figure 2—figure supplement 3 and 4) and species data  
136 (Figure 2—figure supplement 5 and 6).

137

## 138 **DISCUSSION**

139 In contrast to conventional wisdom and several recent review papers, our analysis of 952  
140 species shows little to no support for a negative intraspecific temperature-mass relationship that  
141 is sufficiently strong or common to be considered a biogeographic rule. Three quarters of bird  
142 and mammal species show no significant change in mass across a temperature gradient and  
143 temperature explained less than 10% of intraspecific variation in mass for 87% of species (Figure

144 2A). This was true regardless of taxonomic group (Figure 2 and 3), temporal lag in temperature  
145 (Figure 4), species' size, location, or sampling intensity or extent (Figure 5). These results are  
146 consistent with two previous studies that examined museum specimen size measurements across  
147 latitude. The first study showed that 22 out of 47 North American mammal species studied had  
148 no relationship between latitude and length, and 10 of the 25 significant relationships were  
149 opposite the expected direction (McNab, 1971). The second found a similar proportion of non-  
150 significant results (42/87), but a lower proportion of significant relationships that opposed the  
151 rule (9/45) for carnivorous mammals (Meiri et al., 2004). While more species had significant  
152 negative relationships than positive in both our study and these two museum-based studies, in all  
153 cases less than half of species had significant negative correlations (14 – 41%). In combination  
154 with these two smaller studies, our results suggest that there is little evidence for a strong or  
155 general Bergmann's rule when analyzing raw data instead of summarizing published results.

156 Our results are inconsistent with recent reviews, which have reported that the majority of  
157 species conform to Bergmann's rule (Ashton, 2002; Watt et al., 2010; Meiri and Dayan, 2003).  
158 While these reviews included results that were either non-significant or opposite of Bergmann's  
159 rule, the proportion of significant results in support of Bergmann's rule was higher and therefore  
160 resulted in conclusions that supported the generality of the temperature-mass relationship.  
161 Generalizing from results in the published literature involves the common challenges of  
162 publication bias and selective reporting (Koricheva et al., 2013). In addition, because the  
163 underlying Bergmann's rule studies typically report minimal statistical information, often  
164 providing only relationship significance or direction instead of p-values or correlation  
165 coefficients (Meiri and Dayan, 2003), proper meta-analyses and associated assessments of  
166 biological significance are not possible. While several reviews found no evidence for publication  
167 bias using limited analyses (Ashton, 2002; Meiri et al., 2004), the notable differences between

168 the conclusions of our data-intensive approach and those from reviews suggests that publication  
169 bias in papers about Bergmann's rule warrants further investigation. These differences also  
170 demonstrate the value of data-intensive approaches in ecology for overcoming potential  
171 weaknesses and biases in the published literature. Directly analyzing large quantities of data  
172 from hundreds of species allows us to assess the generality of patterns originally reported in  
173 smaller studies while avoiding the risk of publication bias. This approach also makes it easier to  
174 integrate other factors that potentially influence size into future analyses. The new insight gained  
175 from this data-intensive approach demonstrates the value of investing in large compilations of  
176 ecologically-relevant data (Hampton et al., 2013) and the proper training required to work with  
177 these datasets (Hampton et al., 2017).

178         Our analyses and conclusions are limited to the intraspecific form of Bergmann's rule.  
179 This is the most commonly studied and well-defined form of the relationship and the one most  
180 amenable to analyses using large compilations of museum data. Difficulty in interpreting  
181 Bergmann's original formulation has resulted in an array of different ideas and implementations  
182 of interspecific analyses (Blackburn et al., 1999; Meiri and Thomas, 2007; Watt et al., 2010;  
183 Meiri, 2011). The most common forms of these interspecific analyses involve correlations  
184 between various species-level size metrics and environmental measures and are conducted at  
185 various taxonomic levels from genus to class (e.g., Clauss et al., 2013; Diniz-Filho, 2007; Boyer  
186 et al., 2010; Blackburn and Gaston, 1996). Efforts to apply data-intensive approaches to the  
187 interspecific form of this relationship will need to address the fact that occurrence records are not  
188 evenly distributed across the geographic range of species and determine how the many  
189 interpretations of interspecific Bergmann's rule are related to one another and the biological  
190 expectations for interspecific responses to temperature.

191         The original formulation of Bergmann's rule, and the scope of our conclusions, apply

192 only to endotherms. However, negative temperature-mass relationships have also been  
193 documented in ectotherms, with the pattern referred to as the size-temperature rule (Ray, 1960;  
194 Angilletta and Dunham, 2003). In contrast to the hypotheses for Bergmann's rule, which are  
195 based primarily on homeostasis (Gardner et al., 2011), the size-temperature rule in ectotherms is  
196 thought to result from differences between growth and development rates (Forster et al., 2011).  
197 The current version of Vertnet contained ectotherm size data for only seven species, which is not  
198 sufficient to complete a comprehensive analysis of the ectotherm size-temperature rule. Future  
199 work exploring the ectotherm size-temperature rule in natural systems using data-intensive  
200 approaches is necessary for understanding the generality of this rule in ectotherms, and data may  
201 be sought for this effort in the literature or via a coordinated effort by museums to continue  
202 digitizing size measurements for specimens.

203         A number of mechanisms have been suggested to explain why higher temperatures  
204 should result in lower body sizes, including heat loss, starvation, resource availability, migratory  
205 ability, and phylogenetic constraints (Blackburn et al., 1999). Most of the proposed hypotheses  
206 have not been tested sufficiently to allow for strong conclusions to be drawn about their potential  
207 to produce Bergmann's rule (Blackburn et al., 1999; Watt et al., 2010; Teplitsky and Millien,  
208 2014) and the widely studied heat loss hypothesis has been questioned for a variety of reasons  
209 (Blackburn et al., 1999; Watt et al., 2010; McNab, 1971; James, 1970; McNamara et al., 2016).  
210 While no existing hypotheses have been confirmed, it is possible that some processes are  
211 producing negative relationships between size and temperature. The lack of a strong relationship  
212 does not preclude processes that result in a negative temperature-mass relationship, but it does  
213 suggest that these processes are have less influence relative to other factors that influence  
214 intraspecific size.

215         The relative importance of the many factors besides temperature that can influence size



216 within a species is as yet unknown. Size is affected by abiotic factors such as humidity and  
217 resource availability (Teplitsky and Millien, 2014), characteristics of individuals like clutch size  
218 (Boyer et al., 2009), and community context, including if and what kinds of gaps there are in  
219 size-related niches (Smith et al., 2010) and the trophic effects of primary productivity on  
220 consumer size (Sheridan and Bickford, 2011). Temperature itself can have indirect effects on  
221 size, such as via habitat changes in water flow or food availability, that result in size responses  
222 opposite of Bergmann's rule (Gardner et al., 2011). Anthropogenic influences have been shown  
223 to influence the effect of temperature on size (Faurby and Araujo, 2016), and similar impacts of  
224 dispersal, extinctions, and the varying scales of climate change have been proposed (Clausen et  
225 al., 2013). Because our data primarily came from North America, further analyses focused on  
226 species native to other continents could reveal differing temperature-mass relationships due to  
227 varying temperature regimes. While our work shows that more species have negative significant  
228 relationships between temperature and mass than positive, only 21% of species have statistically  
229 significant relationships and it consequently appears that some combination of other factors more  
230 strongly drives intraspecific size variation for most taxa.

231         The lack of evidence for temperature as a primary determinant of size variation in  
232 endothermic species calls into question the hypothesis that decreases in organism size may  
233 represent a third universal response to global warming. The potentially general decline in size  
234 with warming was addressed by assessments that evaluated dynamic body size responses to  
235 temperature using similar approaches to the Bergmann's rule reviews discussed above (Teplitsky  
236 and Millien, 2014; Sheridan and Bickford, 2011; Gardner et al., 2011). These temporal reviews  
237 had similar results to those for spatial relationships, but the conclusions of these studies clearly  
238 noted the variability in body size responses and the need for future data-intensive work (Sheridan  
239 and Bickford, 2011; Gardner et al., 2011) using broader temperature ranges (Teplitsky and

240 Millien, 2014) to fully assess the temperature-size relationship.

241           Our results in combination with those from other studies suggest that much of the  
242 observed variation in size is not explained simply by temperature. While there is still potential  
243 for the size of endotherms, and other aspects of organismal physiology and morphology, to  
244 respond to both geographic gradients in temperature and climate change, these responses may  
245 not be as easily explained solely by temperature as has been suggested (Sheridan & Bickford,  
246 2011; Gardner et al., 2011). This requires that future attempts to explain variation in the size of  
247 individuals across space or time use an integrative approach to include the influence of multiple  
248 factors, and their potential interactions, on organism size. This will be facilitated by analyzing  
249 spatiotemporal data similar to that used in this study, which includes wide ranges of time, space,  
250 and environmental conditions for large numbers of species and individuals. This data-intensive  
251 approach provides a unique perspective on the general responses of bird and mammal species to  
252 temperature, and has potential to assist in further investigation of the complex combinations of  
253 factors that determine biogeographic patterns of endotherm size and how species respond to  
254 changes in climate.

255

## 256 **METHODS**

### 257 **Data**

258           Organismal data were obtained from Vertnet, a publicly available data platform for  
259 digitized specimen records from museum collections primarily in North America, but also  
260 includes global data (Constable et al., 2013). Body mass is routinely measured when organisms  
261 are collected, with relatively high precision and consistent methods, by most field biologists,  
262 whose intent is to use those organisms for research and preservation in natural history collections  
263 (Winker, 2000; Hoffmann, 2010). These measurements are included on written labels and

264 ledgers associated with specimens, which are digitized and provided in standard formats, e.g.,  
265 Darwin Core (Wieczorek, 2012). In addition to other trait information, mass has recently been  
266 extracted from Darwin Core formatted records published in Vertnet and converted to a more  
267 usable form (Guralnick et al., 2016). This crucial step reduces variation in how these  
268 measurements are reported by standardizing the naming conventions and harmonizing all  
269 measurement values to the same units (Guralnick et al., 2016). We downloaded the entire  
270 datasets for Mammalia, Aves, Amphibia, and Reptilia available in September 2016 (Bloom et al.,  
271 2016a; Bloom et al., 2016b; Bloom et al., 2016c; Bloom et al., 2016d) using the Data Retriever  
272 (Morris and White, 2013) and filtered for those records that had mass measurements available.  
273 Fossil specimen records with mass measurements were removed.

274         We only analyzed species with at least 30 georeferenced individuals whose collection  
275 dates spanned at least 20 years and collection locations at least five degrees latitude, in order to  
276 ensure sufficient sample size and spatiotemporal extent to accurately represent each species'  
277 temperature-mass relationship. To determine if these thresholds were appropriate, we  
278 additionally explored the impact of increasing and decreasing them (Figure 2–figure supplement  
279 5 and 6). We selected individual records with geographic coordinates for collection location,  
280 collection dates between 1900 and 2010, and species-level taxonomic identification, which were  
281 evaluated to assure no issues with synonymy or clear taxon concept issues. To minimize  
282 inclusion of records of non-adult specimens, we identified the smallest mass associated with an  
283 identified adult life stage category for each species and removed all records with mass values  
284 below this minimum adult size. Results were not qualitatively different due to either additional  
285 filtering based on specimen lifestage (Figure 2–figure supplement 3) or removal of outliers  
286 (Figure 2–figure supplement 4). Temperatures were obtained from the Udel\_AirT\_Precip global  
287 terrestrial raster provided by NOAA from their website at <http://www.esrl.noaa.gov/psd/>, a 0.5

288 by 0.5 decimal degree grid of monthly mean temperatures from 1900 to 2010 (Willmott and  
289 Matsuura, 2001). For each specimen, the mean annual temperature at its collection location was  
290 extracted for the year of collection.

291 This resulted in a final dataset containing records for 273,901 individuals from 952 bird  
292 and mammal species (MSB Mammal Collection (Arctos), 2015; Ornithology Collection  
293 Passeriformes - Royal Ontario Museum, 2015; MVZ Mammal Collection (Arctos), 2015; MVZ  
294 Bird Collection (Arctos), 2015; KUBI Mammalogy Collection, 2016; CAS Ornithology (ORN),  
295 2015; DMNS Bird Collection (Arctos), 2015; UCLA Donald R, 2015; DMNS Mammal  
296 Collection (Arctos), 2015; UAM Mammal Collection (Arctos), 2015; UWBM Mammalogy  
297 Collection, 2015; UAM Bird Collection (Arctos), 2015; UMMZ Birds Collection, 2015; CUMV  
298 Bird Collection (Arctos), 2015; CUMV Mammal Collection (Arctos), 2015; MLZ Bird  
299 Collection (Arctos), 2015; LACM Vertebrate Collection, 2015; CHAS Mammalogy Collection  
300 (Arctos), 2016; Ornithology Collection Non Passeriformes - Royal Ontario Museum, 2015;  
301 KUBI Ornithology Collection, 2014; MSB Bird Collection (Arctos), 2015; Biodiversity  
302 Research and Teaching Collections - TCWC Vertebrates, 2015; TTU Mammals Collection,  
303 2015; CAS Mammalogy (MAM), 2015; Vertebrate Zoology Division - Ornithology, Yale  
304 Peabody Museum, 2015; University of Alberta Mammalogy Collection (UAMZ), 2015; UAZ  
305 Mammal Collection, 2016; Conner Museum, 2015; SBMNH Vertebrate Zoology, 2015; Cowan  
306 Tetrapod Collection - Birds, 2015; Cowan Tetrapod Collection - Mammals, 2015; NMMNH  
307 Mammal, 2015; Schmidt Museum of Natural History\_Mammals, 2015; USAC Mammals  
308 Collection, 2013; MLZ Mammal Collection (Arctos), 2015; Ohio State University Tetrapod  
309 Division - Bird Collection (OSUM), 2015; AMNH Mammal Collections, 2015; DMNH Birds,  
310 2015; CM Birds Collection, 2015; WNMU Mammal Collection (Arctos), 2015; UCM Mammals  
311 Collection, 2015; UWYMV Bird Collection (Arctos), 2015; NCSM Mammals Collection, 2015;

312 Vertebrate Zoology Division - Mammalogy, Yale Peabody Museum, 2015; HSU Wildlife  
313 Mammals, 2016; WNMU Bird Collection (Arctos), 2015; UWBM Ornithology Collection, 2015;  
314 UCM Birds, 2015; University of Alberta Ornithology Collection (UAMZ), 2015; SDNHM Birds  
315 Collection, 2015). The average number of individuals per species was 288, ranging from 30 to  
316 15,415 individuals. The species in the dataset were diverse, including volant, non-volant,  
317 placental, and marsupial mammals, and both migratory and non-migratory birds. There were  
318 species from all continents except Antarctica, though the majority of the data were concentrated  
319 in North America (Figure 1A). The distribution of the species' mean masses was strongly right-  
320 skewed, as expected for broad scale size distributions (Brown and Nicoletto, 1991), with 74% of  
321 species having average masses less than 100 g. Size ranged from very small (3.7 g desert shrew  
322 *Notiosorex crawfordi* and 2.6 g calliope hummingbird *Stellula calliope*) to very large (63 kg  
323 harbor seal *Phoca vitulina* and 5.8 kg wild turkey *Meleagris gallopavo*). These specimen data  
324 and code have been deposited online in the Dryad Data Repository (<http://datadryad.org/>).

325

## 326 **Analysis**

327 We fit the intraspecific relationship between mean annual temperature and mass for each  
328 species with ordinary least squares linear regression (e.g., Figure 1B,C,D and Figure 1–figure  
329 supplement 1-12) using the statsmodels.formula.api module in Python (Seabold and Perktold,  
330 2010). The strength of each species' relationship was characterized by the correlation coefficient  
331 and its significant at alpha of 0.05. When assessing statistical significance with large numbers of  
332 correlations it is important to consider the expected distribution of these correlations under the  
333 null model that no correlation exists for any species.

334 We addressed this issue by using false discovery rate control (Benajmini and Hochberg,  
335 1995) implemented with the stats package in R (R Core Team, 2016). This method determines

336 the expected distribution of values for  $p$  (or  $Z$ ) in the case where no relationship exists for  
337 individual correlation and adjusts observed values to control for excessive false positives.  
338 Specifically, it maintains the Type I error rate (proportion of false positives) across all tests at the  
339 chosen value of alpha and therefore gives an accurate estimate of the number of significant  
340 relationships (Benajmini and Hochberg, 1995). This allows us to estimate the number of species  
341 with true positive and negative correlations (i.e., those that have values that exceed those  
342 expected from the null distribution). We then compared the number of species with positive and  
343 negative correlation coefficients, and the proportion of those with statistically significant  
344 adjusted  $p$ -values.

345 We investigated various potential correlates of the strength of Bergmann's rule. Because  
346 it has been argued that Bergmann's rule is exhibited more strongly by some groups than others  
347 (McNab, 1971), we examined correlation coefficient distributions within each class and order.  
348 Additionally, distributions for migrant and nonmigrant bird species were compared due to  
349 conflicting evidence about the impact of migration on temperature-mass relationships (Ashton,  
350 2002). As a temporal lag in size response to temperature is likely due to individuals of a species  
351 responding to temperatures prior to their collection year (e.g., Stacey and Fellowes, 2002), we  
352 assessed species' temperature-mass relationships using temperatures from 1 to 110 years prior to  
353 collection year. We also examined the relationship between species' correlation coefficients and  
354 five variables to understand potential statistical and biological influences on the results. We did  
355 so with the number of individuals, temperature range, and mass range to determine if the  
356 relationship was stronger when more data points or more widely varying values were available.  
357 Because it has been argued that Bergmann's rule is stronger in larger species (Steudel et al.,  
358 1994) and at higher latitudes (Freckleton et al., 2003; Faurby and Araújo, 2016), we examined  
359 variability with both mean mass and mean latitude for each species. We also conducted all

360 analyses using latitude instead of mean annual temperature.

361

362

### 363 **Acknowledgements**

364 Thanks to all of the Vertnet data providers, Dan McGlinn for assistance with developing this

365 research, and Rafael LaFrance for his trait extraction work.

366

### 367 **Competing financial interests**

368 No competing financial interests

369

370

371

372

373

### 374 **REFERENCES**

375

376 AMNH Mammal Collections. American Museum of Natural History. Source:  
377 [http://ipt.vertnet.org:8080/ipt/resource.do?r=amnh\\_mammals](http://ipt.vertnet.org:8080/ipt/resource.do?r=amnh_mammals) (source published on 2015-  
378 02-12, accessed on 2017-10-19)

379 Angilletta, Michael J, and Arthur E Dunham. “The Temperature-Size Rule in Ectotherms:  
380 Simple Evolutionary Explanations May Not Be General.” *American Naturalist* 162, no. 3  
381 (2003): 332–42. doi:10.1086/377187.

382 Ashton, KG, MC Tracy, and Alan De Queiroz. “Is Bergmann’s Rule Valid for Mammals?” *The*  
383 *American Naturalist* 156, no. 4 (2000): 390–415.

384 Ashton, KG. “Patterns of Within-species Body Size Variation of Birds: Strong Evidence for  
385 Bergmann’s Rule.” *Global Ecology and Biogeography* 11 (2002): 505–23.

386 Barnett, Raymond J. “Bergmann’s Rule and Variation in Structures Related to Feeding in  
387 the Gray Squirrel.” *Evolution* 31, no. 3 (1977): 538–45.

388 Benajmini, Yoav, and Yosef Hochberg. “Controlling the False Discovery Rate : A Practical and  
389 Powerful Approach to Multiple Testing Author ( S ): Yoav Benjamini and Yosef Hochberg  
390 Source : Journal of the Royal Statistical Society . Series B ( Methodological ), Vol . 57 , No  
391 . 1 Published by :” *J R Statist Soc B* 57, no. 1 (1995): 289–300.

392 Bergmann, C. “Uber Die Verhältnisse Der Warmekonomie Der Tiere Zu Ihrer Grosse.”  
393 *Gottinger Studien* 3 (1847): 595–708.

- 394 Biodiversity Research and Teaching Collections - TCWC Vertebrates. Texas A&M University  
395 Biodiversity Research and Teaching Collections. Source:  
396 [http://ipt.vertnet.org:8080/ipt/resource.do?r=tcwc\\_verts](http://ipt.vertnet.org:8080/ipt/resource.do?r=tcwc_verts) (source published on 2015-09-05,  
397 accessed on 2017-10-19)
- 398 Blackburn, TM, and KJ Gaston. "Spatial Patterns in the Body Sizes of Bird Species in the New  
399 World." *Oikos* 77 (1996): 436–46.
- 400 Blackburn, TM, KJ Gaston, and Natasha Loder. "Geographic Gradients in Body Size: A  
401 Clarification of Bergmann's Rule." *Diversity and Distributions*, 1999, 165–74.
- 402 Bloom, David, John Wieczorek, and Laura Russell. "Vertnet\_Amphibia\_Sep2016," 2016.  
403 [http://datacommons.cyverse.org/browse/iplant/home/shared/commons\\_repo/curated/Vertnet](http://datacommons.cyverse.org/browse/iplant/home/shared/commons_repo/curated/Vertnet_Amphibia_Sep2016)  
404 [\\_Amphibia\\_Sep2016](http://datacommons.cyverse.org/browse/iplant/home/shared/commons_repo/curated/Vertnet_Amphibia_Sep2016).
- 405 Bloom, David, John Wieczorek, and Laura Russell. "Vertnet\_Aves\_Sep2016," 2016.  
406 [http://datacommons.cyverse.org/browse/iplant/home/shared/commons\\_repo/curated/Vertnet](http://datacommons.cyverse.org/browse/iplant/home/shared/commons_repo/curated/Vertnet_Aves_Sep2016)  
407 [\\_Aves\\_Sep2016](http://datacommons.cyverse.org/browse/iplant/home/shared/commons_repo/curated/Vertnet_Aves_Sep2016).
- 408 Bloom, David, John Wieczorek, and Laura Russell. "Vertnet\_Mammalia\_Sep2016," 2016.  
409 [http://datacommons.cyverse.org/browse/iplant/home/shared/commons\\_repo/curated/Vertnet](http://datacommons.cyverse.org/browse/iplant/home/shared/commons_repo/curated/Vertnet_Mammalia_Sep2016)  
410 [\\_Mammalia\\_Sep2016](http://datacommons.cyverse.org/browse/iplant/home/shared/commons_repo/curated/Vertnet_Mammalia_Sep2016).
- 411 Bloom, David, John Wieczorek, and Laura Russell. "Vertnet\_Reptilia\_Sep2016," 2016.  
412 [http://datacommons.cyverse.org/browse/iplant/home/shared/commons\\_repo/curated/Vertnet](http://datacommons.cyverse.org/browse/iplant/home/shared/commons_repo/curated/Vertnet_Reptilia_Sep2016)  
413 [\\_Reptilia\\_Sep2016](http://datacommons.cyverse.org/browse/iplant/home/shared/commons_repo/curated/Vertnet_Reptilia_Sep2016).
- 414 Boyer, Alison G., Jean-Luc E. Cartron, and James H. Brown. "Interspecific Pairwise  
415 Relationships among Body Size, Clutch Size and Latitude: Deconstructing a  
416 Macroecological Triangle in Birds." *Journal of Biogeography* 37, no. 1 (August 2009): 47–  
417 56. doi:10.1111/j.1365-2699.2009.02175.x.
- 418 Brose, Ulrich, Jennifer A Dunne, Jose M Montoya, Owen L Petchey, Florian D Schneider, and  
419 Ute Jacob. "Climate Change in Size-Structured Ecosystems." *Philosophical Transactions of*  
420 *the Royal Society B: Biological Sciences* 367, no. 1605 (2012): 2903–12.  
421 doi:10.1098/rstb.2012.0232.
- 422 Brown, James H, and Paul F Nicoletto. "Spatial Scaling of Species Composition: Body Masses  
423 of North American Land Mammals." *The American Naturalist* 138, no. 6 (1991): 1478–  
424 1512. doi:10.1086/285297.
- 425 Brown, James H., and Anthony K. Lee. "Bergmann's Rule and Climatic Adaptation in  
426 Woodrats ( *Neotoma* )." *Evolution* 23, no. 2 (1969): 329–38.
- 427 Carotenuto, Francesco, José Alexandre Felizola Diniz-Filho, and Pasquale Raia. "Space and  
428 Time: The Two Dimensions of Artiodactyla Body Mass Evolution." *Palaeogeography,*  
429 *Palaeoclimatology, Palaeoecology* 437 (2015): 18–25. doi:10.1016/j.palaeo.2015.07.013.
- 430 Caruso, Nicholas M., Michael W. Sears, Dean C. Adams, and Karen R. Lips. "Widespread Rapid  
431 Reductions in Body Size of Adult Salamanders in Response to Climate Change." *Global*  
432 *Change Biology* 20, no. 6 (2014): 1751–59. doi:10.1111/gcb.12550.
- 433 CAS Mammalogy (MAM). California Academy of Sciences. Source:  
434 <http://ipt.calacademy.org:8080/ipt/resource.do?r=mam> (source published on 2015-10-05,  
435 accessed on 2017-10-19)
- 436 CAS Ornithology (ORN). California Academy of Sciences. Source:  
437 <http://ipt.calacademy.org:8080/ipt/resource.do?r=orn> (source published on 2015-10-05,  
438 accessed on 2017-10-19)
- 439 CHAS Mammalogy Collection (Arctos). Chicago Academy of Sciences. Source:  
440 [http://ipt.vertnet.org:8080/ipt/resource.do?r=chas\\_mammals](http://ipt.vertnet.org:8080/ipt/resource.do?r=chas_mammals) (source published on 2016-06-



- 441 23, accessed on 2017-10-19)
- 442 Clauss, Marcus, Marie T. Dittmann, Dennis W H Müller, Carlo Meloro, and Daryl Codron.  
443 “Bergmann’s Rule in Mammals: A Cross-Species Interspecific Pattern.” *Oikos* 122, no. 10  
444 (2013): 1465–72. doi:10.1111/j.1600-0706.2013.00463.x.
- 445 CM Birds Collection. Carnegie Museum of Natural History. Source:  
446 [http://ipt.vertnet.org:8080/ipt/resource.do?r=cm\\_birds](http://ipt.vertnet.org:8080/ipt/resource.do?r=cm_birds) (source published on 2015-10-11,  
447 accessed on 2017-10-19)
- 448 Conner Museum. Charles R. CRCM Vertebrate Collection. Source:  
449 [http://ipt.vertnet.org:8080/ipt/resource.do?r=crcm\\_verts](http://ipt.vertnet.org:8080/ipt/resource.do?r=crcm_verts) (source published on 2015-10-13,  
450 accessed on 2017-10-19)
- 451 Constable, Heather, Robert Guralnick, John Wieczorek, Carol Spencer, A. Townsend Peterson,  
452 Hank Bart, John Bates, et al. “VertNet: A New Model for Biodiversity Data Sharing.” *PLoS*  
453 *Biology* 8, no. 2 (2010): 1–4. doi:10.1371/journal.pbio.1000309.
- 454 Cowan Tetrapod Collection - Birds. University of British Columbia Beaty Biodiversity Museum.  
455 Source: [http://ipt.vertnet.org:8080/ipt/resource.do?r=ubc\\_bbm\\_ctc\\_birds](http://ipt.vertnet.org:8080/ipt/resource.do?r=ubc_bbm_ctc_birds) (source published  
456 on 2015-04-07, accessed on 2017-10-19)
- 457 Cowan Tetrapod Collection - Mammals. University of British Columbia Beaty Biodiversity  
458 Museum. Source: [http://ipt.vertnet.org:8080/ipt/resource.do?r=ubc\\_bbm\\_ctc\\_mammals](http://ipt.vertnet.org:8080/ipt/resource.do?r=ubc_bbm_ctc_mammals)  
459 (source published on 2015-04-07, accessed on 2017-10-19)
- 460 CUMV Bird Collection (Arctos). Cornell University Museum of Vertebrates. Source:  
461 [http://ipt.vertnet.org:8080/ipt/resource.do?r=cumv\\_bird](http://ipt.vertnet.org:8080/ipt/resource.do?r=cumv_bird) (source published on 2015-10-26,  
462 accessed on 2017-10-19)
- 463 CUMV Mammal Collection (Arctos). Cornell University Museum of Vertebrates. Source:  
464 [http://ipt.vertnet.org:8080/ipt/resource.do?r=cumv\\_mamm](http://ipt.vertnet.org:8080/ipt/resource.do?r=cumv_mamm) (source published on 2015-10-  
465 26, accessed on 2017-10-19)
- 466 Dayan, Tamar, Eitan Tchernov, Yoram Yom-tov, and Daniel Simberloff. “Ecological Character  
467 Displacement in Saharo-Arabian Vulpes : Outfoxing Bergmann’s Rule.” *Oikos* 55, no.  
468 2 (1989): 263–72.
- 469 Diniz-Filho, José Alexandre F., Luis Mauricio Bini, Miguel Á. Rodríguez, Thiago Fernando L.  
470 V. B. Rangel, and Bradford a. Hawkins. “Seeing the Forest for the Trees: Partitioning  
471 Ecological and Phylogenetic Components of Bergmann’s Rule in European Carnivora.”  
472 *Ecography* 30, no. 4 (August 2007): 598–608. doi:10.1111/j.2007.0906-7590.04988.x.
- 473 DMNH Birds. Delaware Museum of Natural History. Source:  
474 [http://ipt.vertnet.org:8080/ipt/resource.do?r=dmnh\\_birds](http://ipt.vertnet.org:8080/ipt/resource.do?r=dmnh_birds) (source published on 2015-10-20,  
475 accessed on 2017-10-19)
- 476 DMNS Bird Collection (Arctos). Denver Museum of Nature & Science. Source:  
477 [http://ipt.vertnet.org:8080/ipt/resource.do?r=dmns\\_bird](http://ipt.vertnet.org:8080/ipt/resource.do?r=dmns_bird) (source published on 2015-10-26,  
478 accessed on 2017-10-19)
- 479 DMNS Mammal Collection (Arctos). Denver Museum of Nature & Science. Source:  
480 [http://ipt.vertnet.org:8080/ipt/resource.do?r=dmns\\_mamm](http://ipt.vertnet.org:8080/ipt/resource.do?r=dmns_mamm) (source published on 2015-10-  
481 26, accessed on 2017-10-19)
- 482 Faurby, Søren, and Miguel B. Araújo. “Anthropogenic Impacts Weaken Bergmann’s Rule.”  
483 *Ecography*, no. June (2016): 1–2. doi:10.1111/ecog.02287.
- 484 Forster, Jack, Andrew G Hirst, and Guy Woodward. “Growth and Development Rates Have  
485 Different Thermal Responses.” *The American Naturalist* 178, no. 5 (November 2011): 668–  
486 78. doi:10.1086/662174.
- 487 Freckleton, RP, PH Harvey, and Mark Pagel. “Bergmann’s Rule and Body Size in Mammals.”

- 488 *The American Naturalist* 161, no. 5 (2003): 821–25.
- 489 Fuentes, Eduardo R, and Fabián M Jaksić. “Latitudinal Size Variation of Chilean Foxes: Tests of  
490 Alternative Hypotheses.” *Ecology* 60, no. 1 (1979): 43–47. doi:10.2307/1936466.
- 491 Gardner, Janet L, Anne Peters, Michael R Kearney, Leo Joseph, and Robert Heinsohn.  
492 “Declining Body Size: A Third Universal Response to Warming?” *Trends in Ecology &*  
493 *Evolution* 26, no. 6 (June 2011): 285–91. doi:10.1016/j.tree.2011.03.005.
- 494 Gardner, Janet L, Robert Heinsohn, and Leo Joseph. “Shifting Latitudinal Clines in Avian Body  
495 Size Correlate with Global Warming in Australian Passerines.” *Proceedings: Biological*  
496 *Sciences* 276, no. 1674 (2009): 3845–52. doi:10.2307/30245347.
- 497 Geist, V. “Bergmann’s Rule Is Invalid.” *Canadian Journal of Zoology*, no. 1984 (1987): 1984–  
498 87.
- 499 Guralnick, Robert P., Paula F. Zermoglio, John Wieczorek, Raphael LaFrance, David Bloom,  
500 and Laura Russell. “The Importance of Digitized Biocollections as a Source of Trait Data  
501 and a New VertNet Resource.” *Database: The Journal of Biological Databases and*  
502 *Curation*, 2016, 1–13. doi:10.1093/database/baw158.
- 503 Hampton, S.E., M.B. Jones, L.A. Wasser, M.P. Schildhauer, S.R. Supp, J. Bruno, R.R.  
504 Hernandez, et al. “Skills and Knowledge for Data-Intensive Environmental Research.”  
505 *BioScience* 67, no. 6 (2017): 546–57.
- 506 Hampton, Stephanie E., Carly a. Strasser, Joshua J. Tewksbury, Wendy K. Gram, Amber E.  
507 Budden, Archer L. Batcheller, Clifford S. Duke, and John H. Porter. “Big Data and the  
508 Future of Ecology.” *Frontiers in Ecology and the Environment* 11, no. 3 (2013): 156–62.  
509 doi:10.1890/120103.
- 510 Hoffmann, A, J Decher, F Rovero, J Schaer, C Voigt, and G Wibbelt. “Field Methods and  
511 Techniques for Monitoring Mammals.” *Manual on Field Recording Techniques and*  
512 *Protocols for All Taxa Biodiversity Inventories and Monitoring* 8 (2010): 482–529.
- 513 HSU Wildlife Mammals. Humboldt State University. Source:  
514 [http://ipt.vertnet.org:8080/ipt/resource.do?r=hsu\\_wildlife\\_mammals](http://ipt.vertnet.org:8080/ipt/resource.do?r=hsu_wildlife_mammals) (source published on  
515 2016-03-14, accessed on 2017-10-19)
- 516 Huston, Michael A., and Steve Wolverton. “Regulation of Animal Size by eNPP, Bergmann’s  
517 Rule, and Related Phenomena.” *Ecological Monographs* 81, no. 3 (2011): 349–405.  
518 doi:10.1890/07-1861.1.
- 519 International, Birdlife. “Migratory Status of Bird Species of the World.” Available from:  
520 <http://datazone.birdlife.org/species/requestdis> (accessed on 8/25/17) 2017.
- 521 James, Frances C. “Geographic Size Variation in Birds and Its Relationship to Climate.” *Ecology*  
522 51, no. 3 (1970): 365–90.
- 523 Kendeigh, S Charles. “Tolerance of Cold and Bergmann’s Rule.” *The Auk* 86, no. 1 (1969): 13–  
524 25.
- 525 Koricheva, Julia, Jessica Gurevitch, and Kerrie Mengersen. *Handbook of Meta-Analysis in*  
526 *Ecology and Evolution*, 2013. doi:10.2307/j.ctt24hq6n.
- 527 KUBI Mammalogy Collection. KU Biodiversity Institute. Source:  
528 [http://ipt.nhm.ku.edu/ipt/resource.do?r=kubi\\_mammals](http://ipt.nhm.ku.edu/ipt/resource.do?r=kubi_mammals) (source published on 2016-02-03,  
529 accessed on 2017-10-19)
- 530 KUBI Ornithology Collection. KU Biodiversity Institute. Source:  
531 [http://ipt.nhm.ku.edu/ipt/resource.do?r=kubi\\_ornithology](http://ipt.nhm.ku.edu/ipt/resource.do?r=kubi_ornithology) (source published on 2014-12-17,  
532 accessed on 2017-10-19)
- 533 LACM Vertebrate Collection. Natural History Museum of Los Angeles County. Source:  
534 [http://ipt.vertnet.org:8080/ipt/resource.do?r=lacm\\_verts](http://ipt.vertnet.org:8080/ipt/resource.do?r=lacm_verts) (source published on 2015-04-17,

- 535 accessed on 2017-10-19)
- 536 Langvatn, R, and Steve D Albon. “Geographic Clines in Body-Weight of Norwegian Red Deer -  
537 A Novel Explanation of Bergmann Rule.” *Holarctic Ecology* 9, no. 4 (1986): 285–93.
- 538 McNab, Brian K. “On the Ecological Significance of Bergmann’s Rule,” 1971.
- 539 Mcnamara, John M., Andrew D. Higginson, and Simon Verhulst. “The Influence of the  
540 Starvation-Predation Trade-off on the Relationship between Ambient Temperature and  
541 Body Size among Endotherms.” *Journal of Biogeography* 43, no. 4 (2016): 809–19.  
542 doi:10.1111/jbi.12695.
- 543 Meiri, Shai, and Tamar Dayan. “On the Validity of Bergmann’s Rule.” *Journal of Biogeography*,  
544 no. 1847 (2003): 331–51.
- 545 Meiri, Shai, Tamar Dayan, and Daniel Simberloff. “Carnivores, Biases and Bergmann’ S Rule.”  
546 *Biological Journal of the Linnean Society* 81 (2004): 579–88. doi:10.1111/j.1095-  
547 8312.2004.00310.x.
- 548 Meiri, Shai. “Bergmann’s Rule-What’s in a Name?” *Global Ecology and Biogeography* 20, no. 1  
549 (2011): 203–7. doi:10.1111/j.1466-8238.2010.00577.x.
- 550 MLZ Bird Collection (Arctos). Moore Laboratory of Zoology. Source:  
551 [http://ipt.vertnet.org:8080/ipt/resource.do?r=mlz\\_bird](http://ipt.vertnet.org:8080/ipt/resource.do?r=mlz_bird) (source published on 2015-10-26,  
552 accessed on 2017-10-19)
- 553 MLZ Mammal Collection (Arctos). Moore Laboratory of Zoology. Source:  
554 [http://ipt.vertnet.org:8080/ipt/resource.do?r=mlz\\_mamm](http://ipt.vertnet.org:8080/ipt/resource.do?r=mlz_mamm) (source published on 2015-10-26,  
555 accessed on 2017-10-19)
- 556 Morris, Benjamin D., and Ethan P. White. “The EcoData Retriever: Improving Access to  
557 Existing Ecological Data.” *PLoS ONE* 8, no. 6 (2013): 1–7.  
558 doi:10.1371/journal.pone.0065848.
- 559 MSB Bird Collection (Arctos). Museum of Southwestern Biology. Source:  
560 [http://ipt.vertnet.org:8080/ipt/resource.do?r=msb\\_bird](http://ipt.vertnet.org:8080/ipt/resource.do?r=msb_bird) (source published on 2015-10-27,  
561 accessed on 2017-10-19)
- 562 MSB Mammal Collection (Arctos). Museum of Southwestern Biology. Source:  
563 [http://ipt.vertnet.org:8080/ipt/resource.do?r=msb\\_mamm](http://ipt.vertnet.org:8080/ipt/resource.do?r=msb_mamm) (source published on 2015-10-27,  
564 accessed on 2017-10-19)
- 565 MVZ Bird Collection (Arctos). Museum of Vertebrate Zoology, UC Berkeley. Source:  
566 [http://ipt.vertnet.org:8080/ipt/resource.do?r=mvz\\_bird](http://ipt.vertnet.org:8080/ipt/resource.do?r=mvz_bird) (source published on 2015-10-27,  
567 accessed on 2017-10-19)
- 568 MVZ Mammal Collection (Arctos). Museum of Vertebrate Zoology, UC Berkeley. Source:  
569 [http://ipt.vertnet.org:8080/ipt/resource.do?r=mvz\\_mammal](http://ipt.vertnet.org:8080/ipt/resource.do?r=mvz_mammal) (source published on 2015-10-  
570 27, accessed on 2017-10-19)
- 571 NCSM Mammals Collection. North Carolina Museum of Natural Sciences. Source:  
572 [http://ipt.vertnet.org:8080/ipt/resource.do?r=ncsm\\_mammals](http://ipt.vertnet.org:8080/ipt/resource.do?r=ncsm_mammals) (source published on 2015-02-  
573 20, accessed on 2017-10-19)
- 574 NMMNH Mammal. New Mexico Museum of Natural History and Science. Source:  
575 [http://ipt.vertnet.org:8080/ipt/resource.do?r=nmmnh\\_mammals](http://ipt.vertnet.org:8080/ipt/resource.do?r=nmmnh_mammals) (source published on 2015-  
576 04-14, accessed on 2017-10-19)
- 577 Ohio State University Tetrapod Division - Bird Collection (OSUM). Ohio State University.  
578 Source: <http://hymfiles.biosci.ohio-state.edu:8080/ipt/resource.do?r=osum-birds> (source  
579 published on 2015-05-22, accessed on 2017-10-19)
- 580 Ornithology Collection Non Passeriformes - Royal Ontario Museum. Royal Ontario Museum.  
581 Source: <http://gbif.rom.on.ca:8180/ipt/resource.do?r=birdsnonpass> (source published on

- 582 2015-06-02, accessed on 2017-10-19)
- 583 Ornithology Collection Passeriformes - Royal Ontario Museum. Royal Ontario Museum. Source:  
584 <http://gbif.rom.on.ca:8180/ipt/resource.do?r=birdspass> (source published on 2015-09-11,  
585 accessed on 2017-10-19)
- 586 R Core Team. “R: A Language and Environment for Statistical Computing,” 2016. R Foundation  
587 for Statistical Computing, Vienna, Austria. <https://www.r-project.org/>.
- 588 Ray, Carleton. “The Application of Bergmann’s and Allen’s Rules to the Poikilotherms.”  
589 *Journal of Morphology* 106, no. 1 (January 1960): 85–108. doi:10.1002/jmor.1051060104.
- 590 Rensch, Bernhard. “Some Problems of Geographical Variation and Species-Formation.”  
591 *Proceedings of the Linnean Society of London* 150, no. 4 (1938): 275–78.
- 592 Sand, Håkan, Göran Cederlund, and Kjell Danell. “Geographical and Latitudinal Variation in  
593 Growth Patterns and Adult Body Size of Swedish Moose (*Alces Alces*.)” *Oecologia* 102,  
594 no. 4 (1995): 433–42. doi:10.1007/BF00341355.
- 595 SBMNH Vertebrate Zoology. Santa Barbara Museum of Natural History. Source:  
596 [http://ipt.vertnet.org:8080/ipt/resource.do?r=sbmnh\\_verts](http://ipt.vertnet.org:8080/ipt/resource.do?r=sbmnh_verts) (source published on 2015-02-17,  
597 accessed on 2017-10-19)
- 598 Schmidt Museum of Natural History\_Mammals. Schmidt Museum of Natural History, Emporia  
599 State University. Source:  
600 [http://ipt.vertnet.org:8080/ipt/resource.do?r=kstc\\_schmidt\\_mammals](http://ipt.vertnet.org:8080/ipt/resource.do?r=kstc_schmidt_mammals) (source published on  
601 2015-02-12, accessed on 2017-10-19)
- 602 SDNHM Birds Collection. San Diego Natural History Museum. Source:  
603 [http://ipt.vertnet.org:8080/ipt/resource.do?r=sdnhm\\_birds](http://ipt.vertnet.org:8080/ipt/resource.do?r=sdnhm_birds) (source published on 2015-04-06,  
604 accessed on 2017-10-19)
- 605 Seabold, Skipper, and Josef Perktold. “Statsmodels: Econometric and Statistical Modeling with  
606 Python.” *Proceedings of the 9th Python in Science Conference*, no. Scipy (2010): 57–61.
- 607 Sheridan, Jennifer A., and David Bickford. “Shrinking Body Size as an Ecological Response to  
608 Climate Change.” *Nature Climate Change* 1, no. 8 (October 2011): 401–6.  
609 doi:10.1038/nclimate1259.
- 610 Smith, FA, JL Betancourt, and JH Brown. “Evolution of Body Size in the Woodrat over the Past  
611 25,000 Years of Climate Change.” *SCIENCE*, 1995.  
612 [http://biology.unm.edu/fasmith/web\\_page\\_pdfs/smith\\_et\\_al\\_1995\\_science.pdf](http://biology.unm.edu/fasmith/web_page_pdfs/smith_et_al_1995_science.pdf).
- 613 Smith, Felisa a, Alison G Boyer, James H Brown, Daniel P Costa, Tamar Dayan, S K Morgan  
614 Ernest, Alistair R Evans, et al. “The Evolution of Maximum Body Size of Terrestrial  
615 Mammals.” *Science (New York, N.Y.)* 330, no. 6008 (2010): 1216–19.  
616 doi:10.1126/science.1194830.
- 617 Stacey, David A., and Mark D E Fellowes. “Temperature and the Development Rates of Thrips:  
618 Evidence for a Constraint on Local Adaptation?” *European Journal of Entomology* 99, no. 3  
619 (2002): 399–404.
- 620 Steudel, K., W. P. Porter, and D. Sher. “The Biophysics of Bergmann’s Rule: A Comparison of  
621 the Effects of Pelage and Body Size Variation on Metabolic Rate.” *Canadian Journal of  
622 Zoology* 72, no. 1 (1994): 70–77. doi:10.1139/z94-010.
- 623 Stillwell, R. Craig. “Are Latitudinal Clines in Body Size Adaptive?” *Oikos* 119, no. 9 (2010):  
624 1387–90. doi:10.1111/j.1600-0706.2010.18670.x.
- 625 Teplitsky, Celine, and Virginie Millien. “Climate Warming and Bergmann’s Rule through Time:  
626 Is There Any Evidence?” *Evolutionary Applications* 7, no. 1 (January 2014): 156–68.  
627 doi:10.1111/eva.12129.
- 628 TTU Mammals Collection. Museum of Texas Tech University (TTU). Source:

629 [http://ipt.vertnet.org:8080/ipt/resource.do?r=ttu\\_mammals](http://ipt.vertnet.org:8080/ipt/resource.do?r=ttu_mammals) (source published on 2015-02-  
630 26, accessed on 2017-10-19)  
631 UAM Bird Collection (Arctos). University of Alaska Museum. Source:  
632 [http://ipt.vertnet.org:8080/ipt/resource.do?r=uam\\_bird](http://ipt.vertnet.org:8080/ipt/resource.do?r=uam_bird) (source published on 2015-10-27,  
633 accessed on 2017-10-19)  
634 UAM Mammal Collection (Arctos). University of Alaska Museum. Source:  
635 [http://ipt.vertnet.org:8080/ipt/resource.do?r=uam\\_mamm](http://ipt.vertnet.org:8080/ipt/resource.do?r=uam_mamm) (source published on 2015-10-27,  
636 accessed on 2017-10-19)  
637 UAZ Mammal Collection. University of Arizona Museum of Natural History. Source:  
638 [http://ipt.vertnet.org:8080/ipt/resource.do?r=uaz\\_mammals](http://ipt.vertnet.org:8080/ipt/resource.do?r=uaz_mammals) (source published on 2016-03-  
639 29, accessed on 2017-10-19)  
640 UCLA Donald R. University of California, Los Angeles. Dickey Bird and Mammal Collection.  
641 Source: [http://ipt.vertnet.org:8080/ipt/resource.do?r=ucla\\_birds\\_mammals](http://ipt.vertnet.org:8080/ipt/resource.do?r=ucla_birds_mammals) (source  
642 published on 2015-03-02, accessed on 2017-10-19)  
643 UCM Birds. University of Colorado Museum of Natural History. Source:  
644 [http://ipt.vertnet.org:8080/ipt/resource.do?r=ucm\\_birds](http://ipt.vertnet.org:8080/ipt/resource.do?r=ucm_birds) (source published on 2015-10-27,  
645 accessed on 2017-10-19)  
646 UCM Mammals Collection. University of Colorado Museum of Natural History. Source:  
647 [http://ipt.vertnet.org:8080/ipt/resource.do?r=ucm\\_mammals](http://ipt.vertnet.org:8080/ipt/resource.do?r=ucm_mammals) (source published on 2015-10-  
648 27, accessed on 2017-10-19)  
649 UMMZ Birds Collection. University of Michigan Museum of Zoology. Source:  
650 [http://ipt.vertnet.org:8080/ipt/resource.do?r=ummz\\_birds](http://ipt.vertnet.org:8080/ipt/resource.do?r=ummz_birds) (source published on 2015-10-28,  
651 accessed on 2017-10-19)  
652 University of Alberta Mammalogy Collection (UAMZ). University of Alberta Museums. Dataset  
653 DOI: doi:10.18165/brxhjf. Source:  
654 [http://web.macs.ualberta.ca:8088/ipt/resource?r=uamz\\_mammalogy](http://web.macs.ualberta.ca:8088/ipt/resource?r=uamz_mammalogy) (source published on  
655 2015-09-20, accessed on 2017-10-19)  
656 University of Alberta Ornithology Collection (UAMZ). University of Alberta Museums. Dataset  
657 DOI: doi:10.18165/srgkci. Source:  
658 [http://web.macs.ualberta.ca:8088/ipt/resource?r=uamz\\_ornithology](http://web.macs.ualberta.ca:8088/ipt/resource?r=uamz_ornithology) (source published on  
659 2015-09-24, accessed on 2017-10-19)  
660 USAC Mammals Collection. Universidad de San Carlos de Guatemala. Source:  
661 [http://ipt.vertnet.org:8080/ipt/resource.do?r=usac\\_mammals](http://ipt.vertnet.org:8080/ipt/resource.do?r=usac_mammals) (source published on 2013-11-  
662 04, accessed on 2017-10-19)  
663 UWBM Mammalogy Collection. University of Washington Burke Museum. Source:  
664 [http://ipt.vertnet.org:8080/ipt/resource.do?r=uwbm\\_mammals](http://ipt.vertnet.org:8080/ipt/resource.do?r=uwbm_mammals) (source published on 2015-  
665 02-23, accessed on 2017-10-19)  
666 UWBM Ornithology Collection. University of Washington Burke Museum. Source:  
667 [http://ipt.vertnet.org:8080/ipt/resource.do?r=uwbm\\_birds](http://ipt.vertnet.org:8080/ipt/resource.do?r=uwbm_birds) (source published on 2015-02-24,  
668 accessed on 2017-10-19)  
669 UWYMV Bird Collection (Arctos). University of Wyoming Museum of Vertebrates. Source:  
670 [http://ipt.vertnet.org:8080/ipt/resource.do?r=uwymv\\_bird](http://ipt.vertnet.org:8080/ipt/resource.do?r=uwymv_bird) (source published on 2015-10-27,  
671 accessed on 2017-10-19)  
672 Vertebrate Zoology Division - Mammalogy, Yale Peabody Museum. Yale Peabody Museum.  
673 Source: [http://ipt.peabody.yale.edu/ipt/resource.do?r=ipt\\_vz\\_mam](http://ipt.peabody.yale.edu/ipt/resource.do?r=ipt_vz_mam) (source published on  
674 2015-10-09, accessed on 2017-10-19)  
675 Vertebrate Zoology Division - Ornithology, Yale Peabody Museum. Yale Peabody Museum.

- 676 Source: [http://ipt.peabody.yale.edu/ipt/resource.do?r=ipt\\_vz\\_orn](http://ipt.peabody.yale.edu/ipt/resource.do?r=ipt_vz_orn) (source published on  
677 2015-10-09, accessed on 2017-10-19)
- 678 Watt, Cortney, and Volker Salewski. "Bergmann's Rule Encompasses Mechanism: A Reply to  
679 Olalla-Tárraga (2011)." *Oikos* 120, no. 10 (October 2011): 1445–47. doi:10.1111/j.1600-  
680 0706.2011.19968.x.
- 681 Watt, Cortney, Sean Mitchell, and Volker Salewski. "Bergmann's Rule; a Concept Cluster?"  
682 *Oikos* 119, no. 1 (January 2010): 89–100. doi:10.1111/j.1600-0706.2009.17959.x.
- 683 Wieczorek, John, David Bloom, Robert Guralnick, Stan Blum, Markus Döring, Renato  
684 Giovanni, Tim Robertson, and David Vieglais. "Darwin Core: An Evolving Community-  
685 Developed Biodiversity Data Standard." *PLoS ONE* 7, no. 1 (2012): e29715–e29715.  
686 doi:10.1371/journal.pone.0029715.
- 687 Willmott, C.J., and K. Matsuura. "Terrestrial Air Temperature and Precipitation: Monthly and  
688 Annual Time Series (1950-1999)," 2001.  
689 [http://climate.geog.udel.edu/~climate/html\\_pages/README.ghcn\\_ts2.html](http://climate.geog.udel.edu/~climate/html_pages/README.ghcn_ts2.html).
- 690 Winker, Kevin. "Obtaining, Preserving, and Preparing Bird Specimens." *Journal of Field*  
691 *Ornithology* 71, no. 2 (2000): 250–97. doi:10.1648/0273-8570-71.2.250.
- 692 WNMU Bird Collection (Arctos). Western New Mexico University. Source:  
693 [http://ipt.vertnet.org:8080/ipt/resource.do?r=wnmu\\_bird](http://ipt.vertnet.org:8080/ipt/resource.do?r=wnmu_bird) (source published on 2015-10-27,  
694 accessed on 2017-10-19)
- 695 WNMU Mammal Collection (Arctos). Western New Mexico University. Source:  
696 [http://ipt.vertnet.org:8080/ipt/resource.do?r=wnmu\\_mamm](http://ipt.vertnet.org:8080/ipt/resource.do?r=wnmu_mamm) (source published on 2015-10-  
697 27, accessed on 2017-10-19)
- 698 Yom-Tov, Yoram, and Eli Geffen. "Geographic Variation in Body Size: The Effects of Ambient  
699 Temperature and Precipitation." *Oecologia* 148, no. 2 (2006): 213–18. doi:10.1007/s00442-006-  
700 0364-9.

701

702

## 703 **FIGURE LEGENDS**

704

A

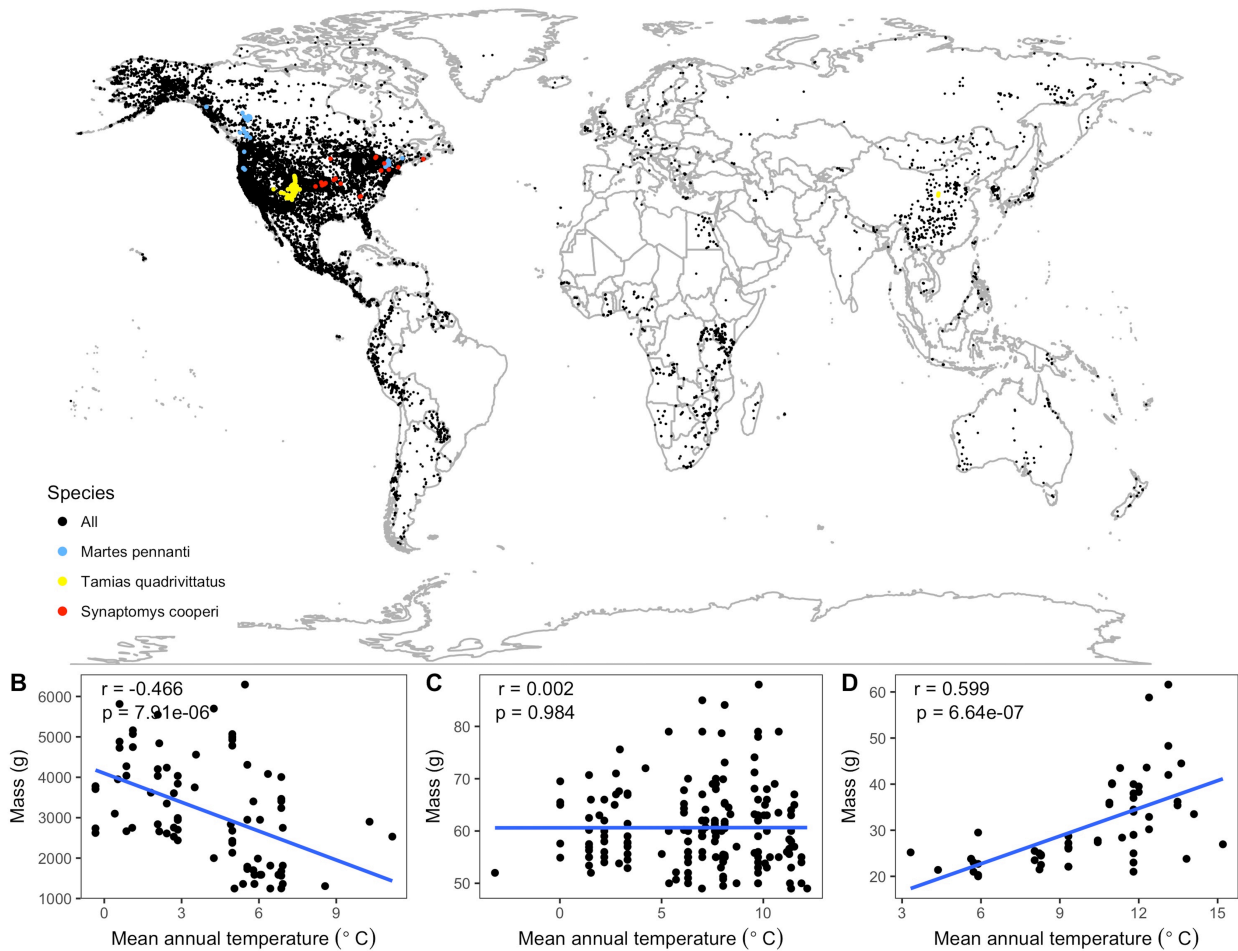

705

706

707

708

709

710

711

712

713

714

715

716

717

718

719

720

**Figure 1. Species spatial distributions and selected temperature-mass relationships. (A)**

Spatial collection locations of all individual specimens. All species shown with black points except three species, whose relationships between mean annual temperature and mass are shown at bottom (B-D), are marked with colored points. These species were chosen as representative of the variability in relationship strength and direction exhibited by the 952 species from the study: *Martes pennanti* had a negative relationship with temperature explaining a substantial amount of variation in mass (B; blue points); *Tamias quadrivittatus* had no directional relationship between temperature and mass with temperature having little explanatory power (C; yellow points); *Synaptomys cooperi* had a strong positive temperature-mass relationship with a correlation coefficient ( $r$ ) in the 99<sup>th</sup> percentile of all species' values (D; red points). Intraspecific temperature-mass relationships are shown with black circles for all individuals and ordinary least squares regression trends as blue lines. Linear regression correlation coefficients and  $p$ -values in upper left hand corner of figure for each species. See figure supplement 1.

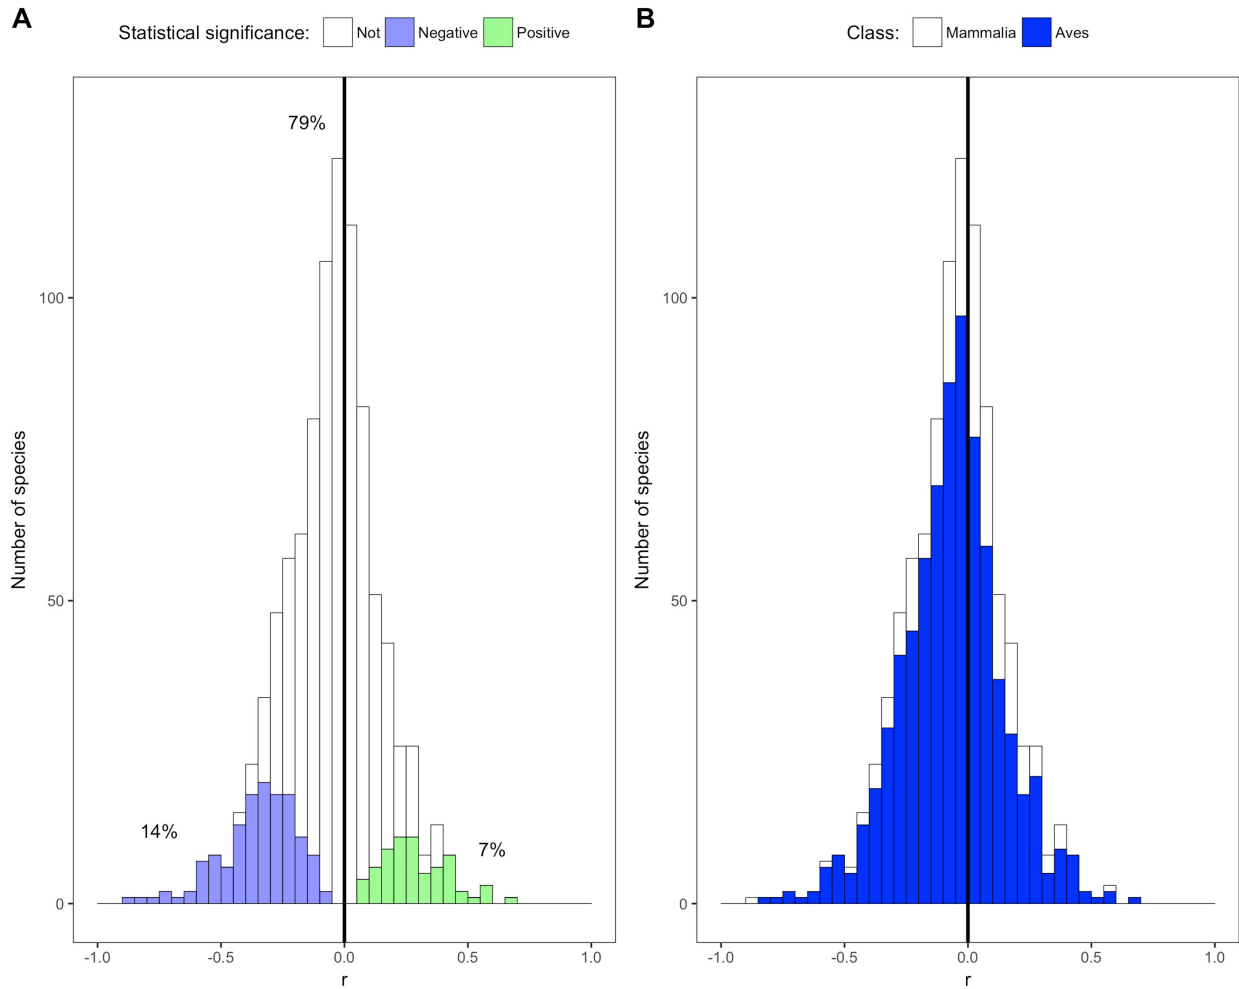

721

722

723

724

725

726

727

728

729

730

731

**Figure 2. Species correlation coefficients by statistical significance and taxonomic class. (A)** Stacked histogram of correlation coefficients ( $r$ ) for all species' intraspecific temperature-mass relationships. Colored bars show species with statistically significant relationships, both negative (purple) and positive (green), while white bars indicate species with relationship slopes that are not significantly different from zero. Percentages shown are percentages of species in each group. **(B)** Stacked histogram of all species' correlation coefficients with bar color corresponding to taxonomic class. Dark vertical lines are correlation coefficients of zero. See figure supplements 1-6.



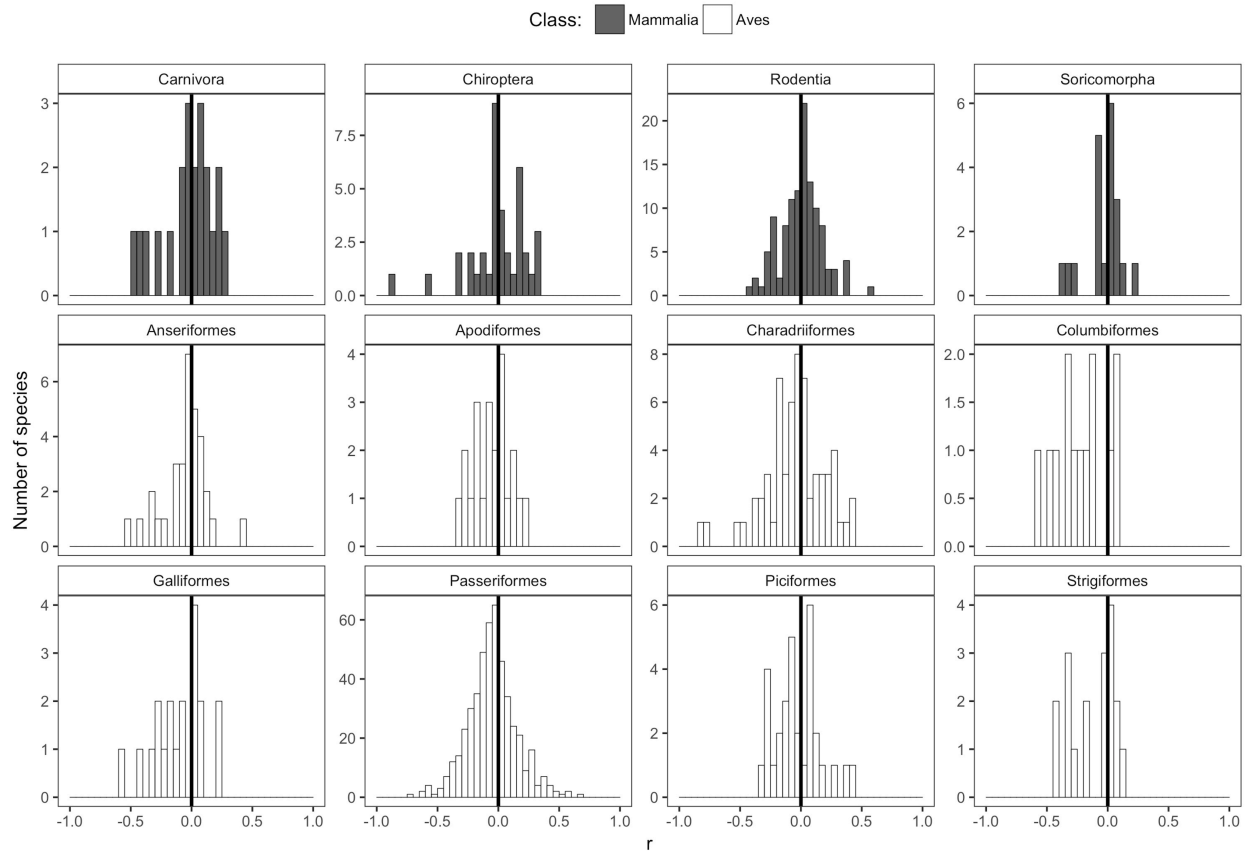

732

733

734

735

736

737

738

739

**Figure 3. Species correlation coefficients for selected taxonomic orders.** Histograms of correlation coefficients ( $r$ ) from intraspecific temperature-mass relationships for each taxonomic order represented by more than ten species, with order shown above histogram. Height of y-axis varies depending on number of species. Bar color indicates taxonomic class. Dark vertical lines are correlation coefficients of zero. For remaining orders, see figure supplement 1.

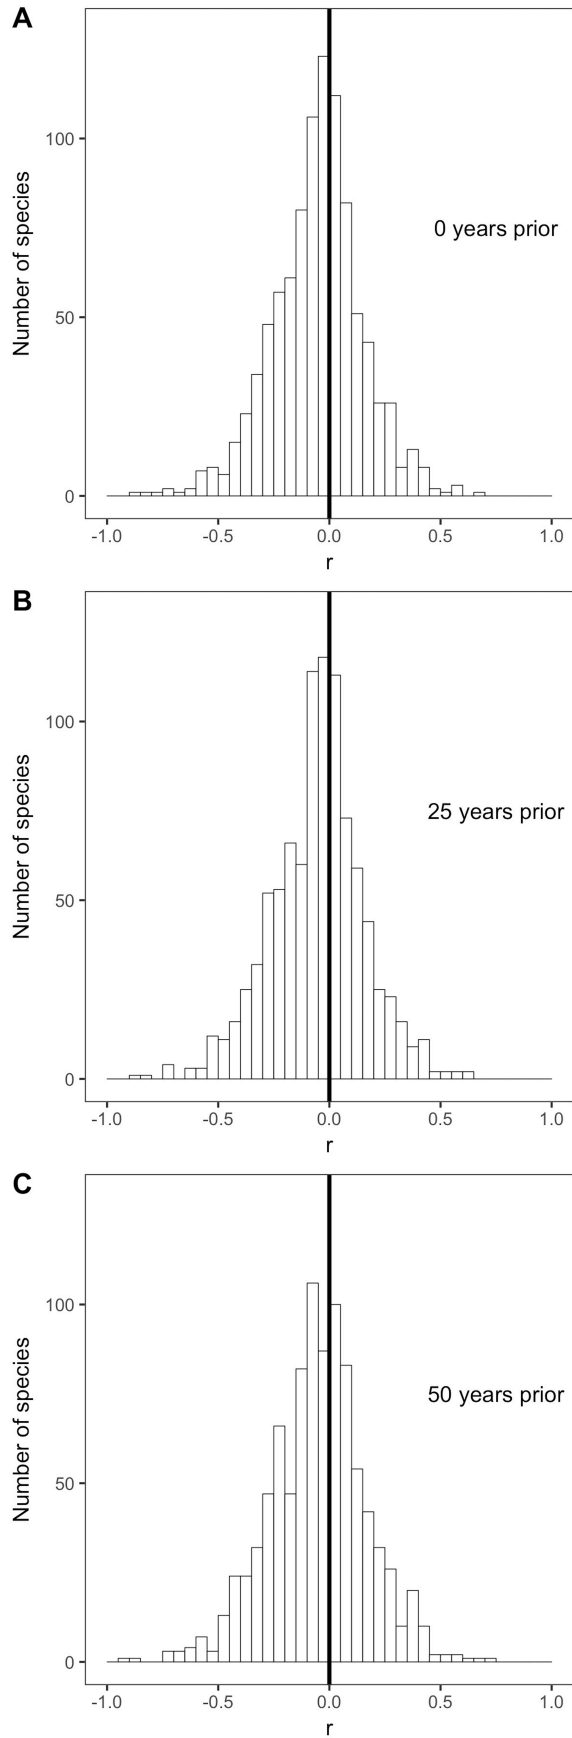

741  
742  
743  
744  
745  
746  
747

**Figure 4. Species correlation coefficients with selected past year temperatures.** Histograms of correlation coefficients ( $r$ ) for all species' intraspecific temperature-mass relationships with mean annual temperature from (A) the year in which individuals were collected, (B) 25 years prior to collection year, and (C) 50 years prior to collection year. Dark vertical lines are correlation coefficients of zero. For all past year temperatures, see figure supplement 1.

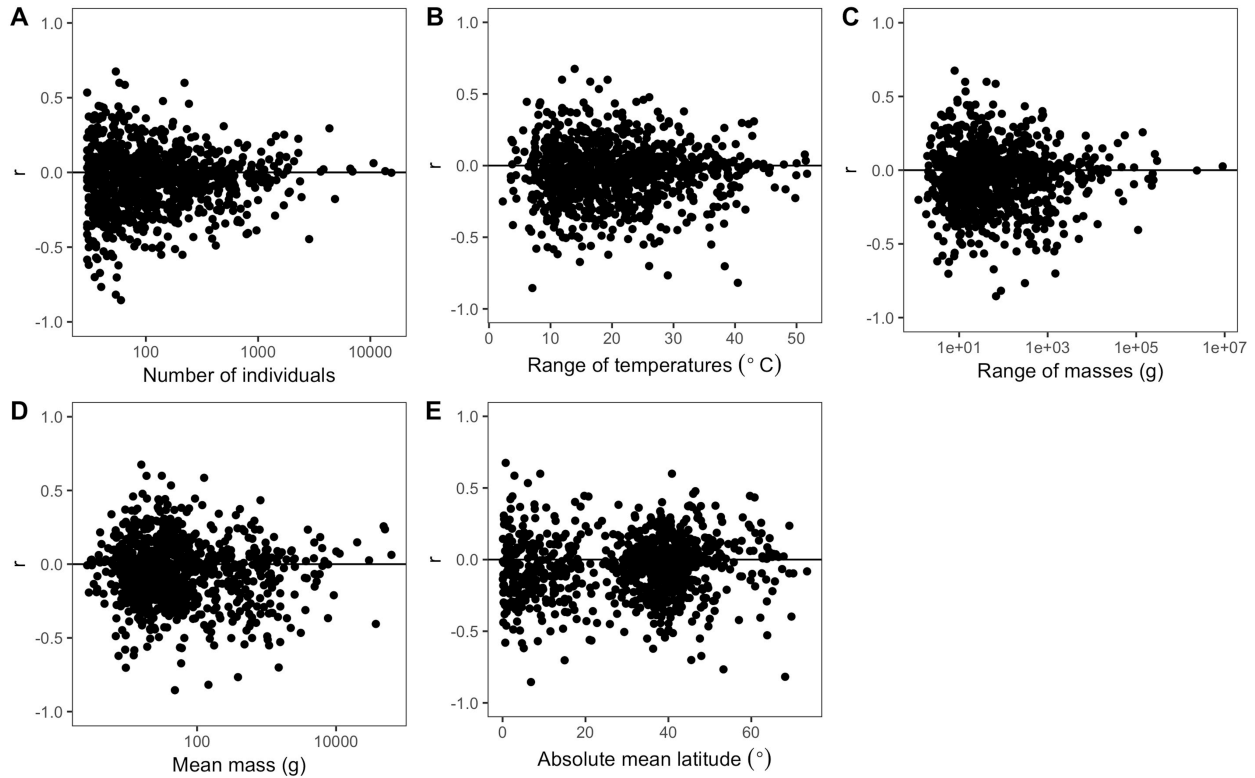

748  
749  
750  
751  
752  
753  
754  
755  
756

**Figure 5. Variability of species correlation coefficients across several variables.** Variation in all species' correlation coefficients ( $r$ ) across the following variables for each species: (A) number of individuals, (B) difference between hottest and coldest collection year temperatures, (C) mass range, (D) mean mass, and (E) absolute mean latitude. Horizontal lines are correlation coefficients of zero. The x-axes of some plots (A, C, D) are on a log scale to better show spread of values.
